# Supplementary material
Source: Research Square preprint supplement (doi:10.21203/rs.3.rs-8953038/v1)
Supplement: Supplementary file 2 [file 77b4551b46df707b62727574.xlsx]

## Sheet: DEP_merged
Table S1. DEP list of TMT analysis in HeLa Cells treated with tBHP (250 μM, 6 h), YTK2205 (5 μM, 6 h), MG132 (1 μM, 24 h), and amino acid starvation (3 h).
Condition	AA								MG								tBHP								YTK2205
Cutoff	1.5				1.2				1.5				1.2				1.5				1.2				1.5				1.2
p-value	0.05		0.1		0.05		0.1		0.05		0.1		0.05		0.1		0.05		0.1		0.05		0.1		0.05		0.1		0.05		0.1
DEP list	up	down	up	down	up	down	up	down	up	down	up	down	up	down	up	down	up	down	up	down	up	down	up	down	up	down	up	down	up	down	up	down
	A5D8V6	A6NHQ2	A5D8V6	A6NHQ2	A0A0J9YXV3	A0A075B6W5	A0A0J9YXV3	A0A075B6W5	A0A075B6W5	A6NHQ2	A0A075B6W5	A2RUC4	A0A075B6W5	A0PJZ3	A0A075B6W5	A0PJZ3	A5D8V6	A6NHQ2	A5D8V6	A6NHQ2	A2AJT9-3	A1IGU5	A1KXE4	A1IGU5	A5D8V6	A6NHQ2	A5D8V6	A6NHQ2	A5D8V6	A1IGU5	A5D8V6	A1IGU5
	O75177	A8MWY0-2	O75177	A8MWY0-2	A4FU49	A0AVI2	A0A0U1RRL7	A0AVI2	O00214-2	B2RC85	O00214-2	A6NHQ2	A6NGB9	A6NHQ2	A0A0U1RRE5	A2RUC4	O15350-13	B2RC85	O15350-13	B2RC85	A4UGR9-2	A5D8V7	A2AJT9-3	A5D8V7	O15127	B2RC85	O15127	B2RC85	A6NCW0	A5D8V7	A6NCW0	A5D8V7
	P01133-2	B2RC85	P01133-2	B2RC85	A5D8V6	A1IGU5	A4FU49	A1IGU5	O00458	O00584	O00458	B2RC85	O00141-4	A8K7I4	A6NGB9	A6NHQ2	O75177	O60356	O75177	O60356	A5D8V6	A6NFY4	A4UGR9-2	A6NFY4	O15350-13	O60356	O15350-13	O60356	B0YJ81-2	A6NHQ2	B0YJ81-2	A6NHQ2
	P01568	C0HLS1	P01568	C0HLS1	A6NCW0	A2A3K4	A5D8V6	A2A3K4	O14493	O15055	O14493	O00584	O00214-2	A8MWY0-2	O00124-3	A8K7I4	P04275	O94868-3	P04275	O94868-3	A6NCW0	A6NHQ2	A5D8V6	A6NHQ2	O15375	O94868-3	O15375	O94868-3	E7ETH6	B2RC85	E7ETH6	B2RC85
	P04733	O15554	P04733	O15554	A8MTT3	A5D8V7	A6NCW0	A2RUC4	O15342	O15075	O15342	O15055	O00220	B2RC85	O00141-4	A8MWY0-2	P43360	O94916-4	P43360	O94916-4	A9YTQ3	B2RC85	A6NCW0	B2RC85	P00326	O94916-4	P00326	O94916-4	O00584	O00124-3	O00584	O00124-3
	P08173	O43502	P08173	O43502	H7BZ55	A6NCI8	A8MTT3	A4UGR9-2	O15550	O15554	O15550	O15075	O00231	L0R6Q1	O00214-2	B2RC85	Q05469-2	Q13480	Q05469-2	Q13480	B0YJ81-2	O00124-3	A9YTQ3	O00124-3	P04275	P31944	P04275	P31944	O00623	O00585	O00623	O00585
	P0DTL6	O94868-3	P0DTL6	O94868-3	O00115-2	A6NHQ2	H7BZ55	A5D8V7	O60238-2	O43502	O60238-2	O15554	O00232	O00584	O00220	L0R6Q1	Q53GL0	Q14134-2	Q53GL0	Q14134-2	O15350-13	O00585	B0YJ81-2	O00585	P23769-2	P37059	P23769-2	P37059	O14522	O60356	O14522	O60356
	P16520	P02656	P16520	P02656	O14513	A8MWY0-2	O00115-2	A6NCI8	O60331	O75840	O60331	O43502	O00273	O15055	O00231	O00217	Q68DA7-3	Q14624-4	Q68DA7-3	Q14624-4	O15516	O14503	O15350-13	O14503	P78317	P59665	P78317	P59665	O15033	O75496	O15033	O75496
	P27816-3	P04275	P27816-3	P04275	O14522	B2RC85	O14513	A6NHQ2	O60337	O94868-3	O60337	O75496	O00408	O15075	O00232	O00258	Q6TFL4	Q5JR59-3	Q6TFL4	Q5JR59-3	O43236-5	O15554	O15516	O15554	Q02078	Q13232	Q02078	Q13232	O15127	O75564	O15127	O75564
	P61626	P10588	P40425	P10588	O15350-13	C0HLS1	O14522	A8MWY0-2	O60356	O94916-4	O60356	O75840	O00458	O15347	O00273	O00470	Q76N32	Q6QNK2	Q76N32	Q6QNK2	O43474-4	O43688	O43236-5	O43688	Q02078-2	Q13480	Q02078-2	Q13480	O15350-13	O94868-3	O15350-13	O94868-3
	P62328	P11362	P61626	P11362	O15550	O00124-3	O15350-13	B2RC85	O75177	P01215	O75177	O94868-3	O00622	O15554	O00408	O00584	Q8IUI8	Q86UB9	Q8IUI8	Q86UB9	O75177	O43781-2	O43474-4	O43781-2	Q05469-2	Q14134-2	Q05469-2	Q14134-2	O15375	O94916-4	O15375	O94916-4
	P63313	P17181	P62328	P17181	O43493	O00258	O15550	C0HLS1	O75190	P04179	O75190	O94916-4	O14493	O43405-2	O00442	O00767	Q8IUZ0-3	Q86WR7	Q8IUZ0-3	Q86WR7	O76074-2	O60356	O75177	O60356	Q12894	Q14624-4	Q12894	Q14624-4	O15516	O95415	O15516	O95415
	Q2NL68	P18405	P63313	P18405	O60331	O00585	O43493	O00124-3	O75190-2	P0DJ07	O75190-2	P01215	O14530	O43502	O00458	O14681-3	Q8N448	Q8N9L9	Q8N448	Q8N9L9	O94900	O75077	O76074-2	O75077	Q3C1V9	Q5JR59-3	Q3C1V9	Q5JR59-3	O60662-2	O95837	O60662-2	O95837
	Q2T9J0	P24043	Q2NL68	P24043	O60662-2	O00767	O60331	O00258	O75190-3	P10588	O75190-3	P04179	O14530-2	O60427	O00566	O14770	Q92685	Q8NA58	Q92685	Q8NA58	P01568	O75319	O94900	O75319	Q5H9F3	Q86WR7	Q5H9F3	Q86WR7	O75072-2	P02656	O75072-2	P02656
	Q6GMR7	P32970	Q2T9J0	P32970	O75177	O15075	O60662-2	O00585	O75954	P13631	O75954	P0DJ07	O14763-2	O60443	O00585	O14832	Q96IK1	Q969P5-2	Q96IK1	Q969P5-2	P02675	O75564	O95644	O75564	Q5VU97	Q8N9L9	Q5VU97	Q8N9L9	O76074-2	P04179	O76074-2	P03928
	Q6TFL4	P37059	Q3C1V9	P37059	O95059	O15554	O75072-2	O00767	O76080	P24043	O76080	P10588	O14977	O60704	O00622	O15055	Q99551	Q96H86	Q99551	Q96H86	P02751-17	O75663	P01568	O75663	Q68DC2	Q8WV19	Q68DC2	Q8WV19	O94900	P13569-2	O94900	P04179
	Q6ZP82-1	P46976-2	Q6GMR7	P46976-2	P01133-2	O43405-2	O75177	O15075	O95164	P41212	O95164	P13631	O15078	O75356	O14493	O15075	Q9BSJ6-2	Q9BRQ3-2	Q9BSJ6-2	Q9BRQ3-2	P02795	O94868-3	P02675	O94868-3	Q6ZP29-2	Q969P5-2	Q6ZP29-2	Q969P5-2	O95872	P17181	O95872	P13569-2
	Q7Z2Y8	P48067-2	Q6TFL4	P48067-2	P01568	O43427-2	O76074-2	O15554	O95271	P43354	O95271	P24043	O15118	O75564	O14530	O15258	Q9BYC2	Q9BV97	Q9BYC2	Q9BV97	P03886	O94916-4	P02751-17	O94916-4	Q86XK2-6	Q96H86	Q86XK2-6	Q96H86	P00326	P19086	P00326	P17181
	Q8WW18	Q13064	Q6ZP82-1	Q13064	P04279-2	O43502	O95059	O43405-2	O95793	P46976-2	O95793	P37059	O15234	O75840	O14530-2	O15265	Q9GZP8	Q9H2V7-3	Q9GZP8	Q9H2V7-3	P04066	O95837	P02795	O95837	Q86XR8-2	Q96S94	Q86XR8-2	Q96S94	P00439	P20936-2	P00439	P19086
	Q96IC2-2	Q13480	Q7Z2Y8	Q13480	P04732	O43688	O95872	O43414	P01133-2	P48060	P01133-2	P41212	O15247	O94782	O14576	O15347	Q9GZP8-2	Q9H9H4	Q9GZP8-2	Q9H9H4	P04275	P01133-2	P03886	P01133-2	Q8IUI8	Q9BRQ3-2	Q8IUI8	Q9BRQ3-2	P02671	P23409	P02671	P20936-2
	Q96RQ1	Q13530-2	Q8WW18	Q13530-2	P04733	O43731	P01133-2	O43427-2	P01344	P53539-10	P01344	P43354	O15297	O94868-3	O14757	O15554	Q9HAH1	Q9UII6	Q9HAH1	Q9UII6	P04732	P02656	P04066	P02656	Q8IUZ0-3	Q9BV97	Q8IUZ0-3	Q9BV97	P02751-17	P23434	P02675	P23409
	Q99551	Q13635	Q96IC2-2	Q13635	P08173	O43752	P01568	O43502	P04114	P56134-4	P04114	P46976-2	O15342	O94888	O14763-2	O43405-2	Q9NVE7		Q9NVE7		P04733	P0C7X2-5	P04275	P04179	Q8IXK2	Q9GZM7-3	Q8IXK2	Q9GZM7-3	P02765	P24043	P02751-17	P23434
	Q9BQD3	Q13772	Q96RQ1	Q13772	P0CK96	O43854-2	P03886	O43688	P08243-2	P98173	P08173	P48060	O15479	O94916-4	O14944	O43414					P08697	P18405	P04732	P0C7X2-5	Q8N3R3	Q9H2V7-3	Q8N3R3	Q9H2V7-3	P03886	P28749	P02765	P24043
	Q9H3M7	Q14332	Q99551	Q14332	P0DPB6	O60637-3	P04279-2	O43731	P09913	Q00266	P08243-2	P53539-10	O15550	O94991	O14977	O43427-2					P09455	P19086	P04733	P18405	Q9BSJ6-2	Q9UHH9	Q9BSJ6-2	Q9UHH9	P04275	P30039-2	P03886	P28749
	Q9NRS4-2	Q14624-4	Q9BQD3	Q14624-4	P0DTL6	O75204	P04732	O43752	P09914	Q02742	P09913	P56134-4	O43242	O95149	O15078	O43482					P13498	P28749	P08173	P19086	Q9GZP8-2	Q9UII6	Q9GZP8-2	Q9UII6	P04733	P31944	P04275	P30039-2
	Q9UIL1-3	Q15004	Q9H3M7	Q15004	P10124	O75496	P04733	O43854-2	P10124	Q12796	P09914	P98173	O43299	O95864	O15118	O43502					P18847-5	P30039-2	P08697	P28749	Q9GZT6-2	Q9ULI4	Q9GZT6-2	Q9ULI4	P08697	P35638	P04733	P31944
		Q15800	Q9NRS4-2	Q15800	P14210-6	O94868-3	P08173	O60637-3	P13498	Q13064	P10124	Q00266	O43301	O96020	O15234	O43505					P29350	P31146	P09455	P29122-7	Q9HAH1		Q9HAH1		P23769-2	P37059	P08173	P35638
		Q5JR59-3	Q9UIL1-3	Q5JR59-3	P15036	O95166	P0CK96	O75204	P16871	Q13480	P13498	Q02742	O43493	P00374	O15247	O43715					P43360	P35638	P13498	P30039-2	Q9HD34		Q9HD34		P41587-2	P51688	P08697	P37059
		Q5JUK3-2		Q5JUK3-2	P15104	O95273	P0DPB6	O75496	P18847-5	Q13491-2	P16871	Q12796	O60238-2	P01023	O15270	O43826					P49356	P37059	P18847-5	P31146	Q9UJA2-2		Q9UJA2-2		P49888	P51970	P23769-2	P51688
		Q5SYB0-3		Q5SYB0-3	P15502	O95620	P0DTL6	O75618	P20591	Q14134-2	P18847-5	Q13064	O60331	P01106-1	O15297	O60427					P53539-10	P46976-2	P29350	P35638					P55198	P59665	P29350	P51970
		Q5SZK8		Q5SZK8	P15735-2	O95832	P10124	O94868-3	P27816-3	Q14624-4	P20591	Q13480	O60333-3	P01215	O15342	O60443					P55198	P78395	P43360	P37059					P57768-2	Q03113	P41587-2	P53539-10
		Q6H3X3-2		Q6H3X3-2	P16520	O95837	P14210-6	O95166	P28562	Q15800	P27816-3	Q13491-2	O60337	P02461	O15479	O60636-2					P57768-2	Q03113	P49356	P46976-2					P61803	Q06190	P49888	P55082-2
		Q6ICC9		Q6ICC9	P17041	O95995-2	P15036	O95273	P30511	Q15818	P28562	Q14134-2	O60356	P02771	O15550	O60704					P61803	Q08AF3	P53539-10	P51178					P78317	Q06278	P55198	P59665
		Q6P9B9		Q6P9B9	P17568	P00326	P15104	O95415	P30532	Q16611-2	P30511	Q14624-4	O60493	P04179	O43150	O60733-2					P62487	Q13064	P55198	P78395					P78560	Q08AF3	P57768-2	Q03113
		Q86VI4-2		Q86VI4-2	P27816-3	P00736	P15502	O95620	P32929	Q5JR59-3	P30532	Q15800	O60566	P09629	O43150-2	O75319					P78317	Q13105	P57768-2	Q03113					Q02078	Q13105	P61803	Q06190
		Q8IZJ3-2		Q8IZJ3-2	P28562	P01023	P15735-2	O95832	P35367	Q5JU69	P32929	Q15818	O60739	P0CG29	O43164-2	O75356					P80297	Q13118-2	P61803	Q08AF3					Q02078-2	Q13118-2	P78317	Q06278
		Q8NA58		Q8NA58	P29350	P01215	P15954	O95837	P35638	Q5JUK3-2	P35367	Q16611-2	O75177	P0DJ07	O43189	O75496					Q05469-2	Q13480	P62487	Q13064					Q05469-2	Q13232	P78560	Q08AF3
		Q8NCM2		Q8NCM2	P35226	P02656	P16520	O95995-2	P38936	Q68BL7	P35638	Q3C1V9	O75190	P10276-2	O43242	O75564					Q14940	Q14134-2	P78317	Q13105					Q08495-3	Q13319	Q02078	Q13105
		Q8NCU8		Q8NCU8	P37840	P02774	P17041	P00326	P50225	Q6P2D0-2	P38936	Q5JR59-3	O75190-2	P10588	O43257	O75817					Q2NL68	Q14142	P80297	Q13118-2					Q12894	Q13480	Q02078-2	Q13118-2
		Q8TD07		Q8TD07	P48307	P02792	P17568	P00736	P51825	Q709F0	P41220-4	Q5JU69	O75190-3	P10589	O43299	O75840					Q53GL0	Q14554	Q05469-2	Q13480					Q12983	Q14134-2	Q05469-2	Q13232
		Q8WXF8		Q8WXF8	P48995	P02794	P18859	P01023	P57682	Q86WR7	P50225	Q5JUK3-2	O75330-2	P13051	O43301	O75915					Q5U651	Q14624-4	Q14940	Q14134-2					Q15072	Q14554	Q08495-3	Q13319
		Q92903		Q92903	P50458	P03973	P25325	P01215	P58004	Q8IVM8	P51825	Q5K4L6	O75348	P13051-2	O43493	O94782					Q643R3	Q15800	Q2NL68	Q14142					Q15583-4	Q14624-4	Q12894	Q13480
		Q93075		Q93075	P55854	P04035	P27816-3	P02656	P58005	Q8N2E6	P57682	Q5SZK8	O75787	P13631	O60238-2	O94868-3					Q68DA7-3	Q4G148-2	Q53GL0	Q14554					Q16610	Q15113	Q12983	Q14134-2
		Q969P5-2		Q969P5-2	P61626	P04156	P28562	P02774	P61244	Q8N3Y1	P58004	Q68BL7	O75954	P14384	O60331	O94888					Q68DC2	Q5D862	Q5U651	Q14624-4					Q2T9J0	Q4G148-2	Q15072	Q14554
		Q96H86		Q96H86	P61956	P04179	P29350	P02792	P61587	Q8N9L9	P58005	Q68CZ1	O76080	P15104	O60333-3	O94916-4					Q6GMR7	Q5JR59-3	Q643R3	Q15800					Q3C1V9	Q5JR59-3	Q15583-4	Q14624-4
		Q99075		Q99075	P62328	P04275	P35226	P02794	P61952	Q8NCU8	P61244	Q6P2D0-2	O94817	P16949	O60337	O94991					Q6NTF9	Q5K4L6	Q68DA7-3	Q4G148-2					Q3ZCT1	Q5K4L6	Q16610	Q15113
		Q9BQ48		Q9BQ48	P63313	P04920	P35638	P03973	P62328	Q8TB45	P61587	Q6P9B9	O94854	P17480-2	O60356	O95149					Q6TFL4	Q5PSV4-2	Q68DC2	Q5D862					Q53RD9-4	Q5PSV4-2	Q2T9J0	Q4G148-2
		Q9BV97		Q9BV97	P78560	P07996	P37840	P04035	Q05469-2	Q8TD07	P61952	Q709F0	O95164	P18405	O60493	O95620					Q6ZMB5	Q5SQI0-7	Q6GMR7	Q5JR59-3					Q5H9F3	Q5SZK8	Q3C1V9	Q5JR59-3
		Q9BXS0-3		Q9BXS0-3	P80297	P09619	P40425	P04156	Q07820	Q8TDP1	P62328	Q86WR7	O95271	P18887	O60566	O95864					Q6ZNW5	Q5VST6	Q6NTF9	Q5K4L6					Q5JZY3	Q5TB80-2	Q3ZCT1	Q5K4L6
		Q9BYG3		Q9BYG3	Q07890	P09629	P42857-2	P04179	Q12983	Q8WVD3	Q05469-2	Q8IVM8	O95359	P20248	O60739	O96020					Q6ZP29-2	Q6PGN9-4	Q6TFL4	Q5PSV4-2					Q5T764	Q66K89	Q53RD9-4	Q5PSV4-2
		Q9GZQ8		Q9GZQ8	Q12894	P0DJ07	P48307	P04275	Q13829	Q92530	Q07820	Q8N2E6	O95613	P24043	O75077	P00325-2					Q76N32	Q6QNK2	Q6ZMB5	Q5SQI0-7					Q5U3C3	Q6NXG1	Q5H9F3	Q5SZK8
		Q9H3F6		Q9H2V7-3	Q13572	P10588	P48995	P04920	Q14393-3	Q92903	Q12983	Q8N3X6	O95786	P24468	O75177	P00374					Q76N89	Q709F0	Q6ZNW5	Q5VST6					Q5VU97	Q6P9B9	Q5JZY3	Q5TB80-2
		Q9H7F4		Q9H3F6	Q14393-3	P11362	P50458	P07996	Q14494-2	Q969E4	Q13829	Q8N3Y1	O95793	P25963	O75190	P01023					Q7Z3D4	Q7Z5G4	Q6ZP29-2	Q6PGN9-4					Q643R3	Q709F0	Q5T764	Q66K89
		Q9NRF9		Q9H7F4	Q14681	P13196	P55854	P09619	Q14534	Q96DU9	Q14393-3	Q8N9L9	O95817	P27701-2	O75190-2	P01106-1					Q8IUD6	Q86UB9	Q76N32	Q6QNK2					Q68DC2	Q75N03	Q5U3C3	Q6NXG1
		Q9P0P0		Q9NRF9	Q14940	P13726	P61626	P09629	Q14940	Q96H86	Q14494-2	Q8NA58	O95832	P28289	O75190-3	P01215					Q8IUI8	Q86WN1	Q76N89	Q6ZP82-1					Q6GMV3	Q7Z5G4	Q5VU97	Q6P9B9
		Q9UHH9		Q9P0P0	Q15572-2	P14543-2	P61803	P0DJ07	Q15011-2	Q96LZ7	Q14534	Q8NCU8	O95905	P28330	O75330-2	P02461					Q8IUZ0-3	Q86WR7	Q7Z3D4	Q709F0					Q6ZMB5	Q86WN1	Q643R3	Q709F0
		Q9UI47		Q9UHH9	Q2M3V2	P15260	P61956	P10588	Q15025-7	Q9BQ48	Q14940	Q8TB45	P00742	P29536-2	O75348	P02771					Q8IWN7	Q8IY50-2	Q8IUD6	Q7Z5G4					Q6ZN66-2	Q86WR7	Q68DA7-3	Q75N03
		Q9UII6		Q9UI47	Q2NL68	P17181	P62328	P11362	Q3BBV0	Q9BUE6	Q15011-2	Q8TD07	P01130	P30039-2	O75787	P04179					Q8IXK2	Q8IZY2	Q8IUI8	Q86UB9					Q6ZNW5	Q8IUZ5	Q68DC2	Q7L1V2
		Q9ULG6		Q9UII6	Q2T9J0	P17302	P63313	P13196	Q5JRC9	Q9BV97	Q15025-7	Q8TDP1	P01133-2	P30613	O75954	P05413					Q8N448	Q8N2F6-3	Q8IUZ0-3	Q86UW9-2					Q6ZP29-2	Q8IV63-3	Q6GMV3	Q7Z5G4
		Q9ULG6-3		Q9ULG6	Q49AM3	P17707	P78560	P13726	Q5SYB0-3	Q9BVJ7	Q3BBV0	Q8WVD3	P01344	P33764	O76080	P05549					Q8WUB2	Q8N3X6	Q8IWN7	Q86WN1					Q76N32	Q8IW50	Q6ZMB5	Q86WN1
		Q9UP38		Q9ULG6-3	Q53HC5	P18405	P80297	P14543-2	Q5T764	Q9BWT1	Q5JRC9	Q92530	P01568	P35244	O94817	P06454-2					Q8WV19	Q8N3Y1	Q8IXK2	Q86WR7					Q76N89	Q8N2Y8	Q6ZN66-2	Q86WR7
				Q9UP38	Q53RD9-4	P19021-2	P82909	P15260	Q5U651	Q9BXR0	Q5SYB0-3	Q92903	P02511	P35713	O94851	P07948					Q8WV48-5	Q8N6S5	Q8N448	Q8IY50-2					Q7Z7L9	Q8N3X6	Q6ZNW5	Q8IUZ5
					Q5SVS4	P19086	Q07890	P17181	Q68CR1-2	Q9BYC9	Q5T764	Q969E4	P02649	P36402	O94854	P08235					Q8WY91	Q8N9L9	Q8N9Q2	Q8IZY2					Q86VQ1	Q8N573	Q6ZP29-2	Q8IV63-3
					Q6GMR7	P19438	Q12894	P17302	Q68DA7-3	Q9BYG3	Q5U651	Q96DU9	P02760	P36402-5	O94921	P09234					Q92685	Q8NA58	Q8WUB2	Q8N2F6-3					Q86XK2-6	Q8N888	Q76N32	Q8IW50
					Q6GMV3	P20742	Q13572	P17707	Q6FIF0	Q9H2V7-3	Q68CR1-2	Q96H86	P02765	P40763	O94972	P09629					Q92870	Q8TBM7-2	Q8WV16-4	Q8N2Y8					Q86XR8-2	Q8N9L9	Q76N89	Q8N2Y8
					Q6P4R8-3	P22692	Q14393-3	P18405	Q6GMR7	Q9H9H4	Q68DA7-3	Q96LZ7	P04114	P41212	O95164	P0CG29					Q96B54	Q8WWN8	Q8WV19	Q8N3X6					Q8IUI8	Q8TB45	Q7Z7L9	Q8N3X6
					Q6TFL4	P24043	Q14681	P19021-2	Q6P4R8-3	Q9NS84	Q6FIF0	Q9BQ48	P05067	P43354	O95271	P0DJ07					Q96IK1	Q969P5-2	Q8WV48-5	Q8N3Y1					Q8IUZ0-3	Q8WTV1-4	Q86VQ1	Q8N3Y1
					Q6ZNW5	P25106	Q14940	P19086	Q6PD74	Q9NSY0	Q6GMR7	Q9BUE6	P07093-2	P46976-2	O95359	P10276-2					Q96IR2	Q96D70	Q8WY91	Q8N6S5					Q8IWN7	Q8WV19	Q86XK2-6	Q8N573
					Q6ZP82-1	P26232	Q15572-2	P19438	Q6ZMZ0	Q9NUU6	Q6P4R8-3	Q9BV97	P07711	P48060	O95359-2	P10588					Q99551	Q96F24	Q92685	Q8N9L9					Q8IXK2	Q8WW18	Q86XR8-2	Q8N888
					Q6ZT07	P27701-2	Q2M3V2	P20742	Q6ZRV2	Q9NWF9	Q6PD74	Q9BVJ7	P08174-4	P48436	O95613	P10589					Q9BQC3	Q96FE7-4	Q92870	Q8NA58					Q8N3R3	Q92536	Q8IUI8	Q8N9L9
					Q70Z35	P28330	Q2NL68	P22692	Q6ZT98	Q9NYZ3	Q6ZMZ0	Q9BWT1	P08243-2	P53539-10	O95677-2	P11474					Q9BSJ6-2	Q96GR4	Q96B54	Q8TBM7-2					Q8N448	Q969P5-2	Q8IUZ0-3	Q8TB45
					Q71RG4-2	P30039-2	Q2T9J0	P24043	Q70Z35	Q9P0S9	Q6ZRV2	Q9BXR0	P09038	P53611	O95677-4	P12532					Q9BSV6	Q96H86	Q96IK1	Q8WW18					Q8WXX7	Q96B45	Q8IWN7	Q8WTV1-4
					Q7Z2Y8	P30281	Q3C1V9	P25106	Q76N89	Q9UHC1	Q6ZT98	Q9BYC9	P09601	P55316	O95714	P13051					Q9BYC2	Q96MX3	Q96IR2	Q8WWN8					Q92685	Q96F24	Q8IXK2	Q8WV19
					Q7Z7A1	P30305-4	Q49AG3	P26232	Q7Z2Y8	Q9UI47	Q70Z35	Q9BYG3	P09913	P56134-4	O95786	P13051-2					Q9BYE9	Q96SL1	Q96LW7-2	Q969P5-2					Q92870	Q96GR4	Q8N3R3	Q8WW18
					Q86VQ1	P30408	Q49AM3	P27701-2	Q7Z419	Q9UIF7-6	Q76N89	Q9H2V7-3	P09914	P56277	O95793	P13631					Q9BZM6	Q9BRQ3-2	Q99551	Q96C12					Q96D09	Q96H86	Q8N448	Q92536
					Q8IUD6	P32970	Q53HC5	P28330	Q86VP1	Q9UII6	Q7Z2Y8	Q9H9H4	P10124	P68431	O95801	P14384					Q9GZP8	Q9BRS8	Q9BQC3	Q96D70					Q96JA3	Q96MX3	Q8WXX7	Q969P5-2
					Q8IVH8-3	P35625	Q53RD9-4	P30039-2	Q86VP1-2	Q9Y221	Q7Z419	Q9NRF9	P11047	P78549-3	O95817	P15104					Q9GZP8-2	Q9BV97	Q9BSJ6-2	Q96F24					Q99551	Q96QG7	Q92685	Q96B45
					Q8IWE4	P37059	Q5SVS4	P30281	Q86XS8-2	Q9Y2Y0-2	Q86VP1	Q9NS84	P11277	P81605	O95832	P15923					Q9H0B3	Q9BVN2	Q9BSV6	Q96FE7-4					Q9BQQ7	Q96S94	Q92870	Q96F24
					Q8IY95	P40189	Q5T7M9	P30305-4	Q8IUI8	Q9Y3D2	Q86VP1-2	Q9NSY0	P12036	P81877	O95905	P15923-2					Q9H1A3-2	Q9BVT8	Q9BYC2	Q96GR4					Q9BSJ6-2	Q99801-2	Q96D09	Q96GR4
					Q8IZV5	P40616	Q5VVJ2	P30408	Q8IVB4	Q9Y3E1	Q86XS8-2	Q9NUU6	P13498	P84243	P00742	P16949					Q9HAH1	Q9BXS0-3	Q9BYE9	Q96H86					Q9BSV6	Q99958	Q96JA3	Q96H86
					Q8N139	P41273	Q6GMR7	P32970	Q8IW50		Q8IUI8	Q9NWF9	P13726	P98173	P00973	P17480-2					Q9NRS4-2	Q9BYG3	Q9BZM6	Q96MX3					Q9BY31	Q9BRQ3-2	Q96PM5-2	Q96MX3
					Q8N3X6	P42685	Q6GMV3	P35625	Q8IW50-3		Q8IVB4	Q9NYZ3	P13984	Q00266	P01130	P18405					Q9NVE7	Q9C0B9	Q9GZP8	Q96SL1					Q9BZM6	Q9BST9	Q99551	Q96QG7
					Q8N8E3	P42702	Q6NVV7	P37059	Q8NA72-3		Q8IW50	Q9P0S9	P13994	Q01151	P01133-2	P18887					Q9NVM1	Q9H211	Q9GZP8-2	Q9BRQ3-2					Q9GZP8	Q9BV97	Q9BQQ7	Q96S94
					Q8N9I9	P46976-2	Q6P4R8-3	P40189	Q8NCX0		Q8IW50-3	Q9UHC1	P14635	Q01664	P01344	P20248					Q9P0N9	Q9H2V7-3	Q9H0B3	Q9BRS8					Q9GZP8-2	Q9BVT8	Q9BSJ6-2	Q99801-2
					Q8ND82	P48060	Q6P9F0	P40616	Q8NE28-3		Q8NA72-3	Q9UI47	P15260	Q02742	P01568	P23610					Q9UJM3	Q9H9H4	Q9H1A3-2	Q9BV97					Q9GZT6-2	Q9BXS0-3	Q9BSV6	Q99958
					Q8NG08	P48067-2	Q6TFL4	P41273	Q8TC12		Q8NCX0	Q9UIF7-6	P16083	Q02880	P02511	P24043					Q9ULN7	Q9NPF2	Q9HAH1	Q9BVN2					Q9H0B3	Q9GZM7-3	Q9BY31	Q9BRQ3-2
					Q8NHX9	P48200	Q6ZNW5	P42685	Q8TCB0		Q8NE28-3	Q9UII6	P16871	Q02880-2	P02649	P24468					Q9UM22	Q9NQR1	Q9NRS4-2	Q9BVT8					Q9H920	Q9H211	Q9BZM6	Q9BST9
					Q8TAP6	P48730	Q6ZP29-2	P42702	Q8TCD1		Q8TC12	Q9Y221	P17066	Q04727	P02656	P25963					Q9Y248	Q9NQR1-2	Q9NVE7	Q9BXS0-3					Q9HAH1	Q9H2V7-3	Q9GZP8	Q9BV97
					Q8TC12	P51674-3	Q6ZP82-1	P43360	Q8TD31		Q8TCB0	Q9Y2Y0-2	P17980	Q07864	P02749	P26572					Q9Y2I8	Q9NRA1	Q9NVM1	Q9BXT8-4					Q9HD34	Q9H9H4	Q9GZP8-2	Q9BVT8
					Q8TCA0	P51884	Q6ZT07	P46976-2	Q8TE58		Q8TCD1	Q9Y3D2	P18847-5	Q12796	P02760	P26583					Q9Y3T6	Q9NRA1-3	Q9P0N9	Q9BYG3					Q9NR55	Q9NQZ2	Q9GZT6-2	Q9BXS0-3
					Q8TCG2	P52569	Q70Z35	P48060	Q8TEY7-2		Q8TD31	Q9Y3E1	P18850	Q12841	P02765	P27701-2					Q9Y6U3	Q9NSG2-3	Q9UJM3	Q9C0B9					Q9NRS4-2	Q9NRE2-2	Q9H0B3	Q9BYG3
					Q8TE73	P53611	Q71RG4-2	P48067-2	Q8WU67		Q8TE58		P20591	Q12934-3	P02788	P27815					Q9Y6U3-2	Q9NUS5	Q9ULN7	Q9H211					Q9NS56-2	Q9NRR3	Q9H7X7	Q9GZM7-3
					Q8WUB8-3	P55082-2	Q7Z2Y8	P48200	Q8WV48-5		Q8TEY7-2		P23458	Q13064	P04114	P28289						Q9NXF8	Q9UM22	Q9H2V7-3					Q9NS84	Q9NSG2-3	Q9H920	Q9H211
					Q8WVP7	P55197-1	Q7Z7A1	P48730	Q8WW22		Q8WU67		P25685	Q13480	P05067	P28330						Q9NZC3	Q9Y248	Q9H9H4					Q9UGM5-2	Q9NUS5	Q9HAH1	Q9H2V7-3
					Q8WW01	P56134-4	Q86VQ1	P51674-3	Q92890		Q8WV16-4		P26367	Q13491-2	P06756	P29034						Q9P0P0	Q9Y2I8	Q9HC10					Q9UJA2-2	Q9NWU2	Q9HD34	Q9H9H4
					Q8WW18	P56377	Q86Y91-6	P51884	Q92963-2		Q8WV48-5		P27816-3	Q14134-2	P07093-2	P29536-2						Q9P291	Q9Y3T6	Q9NPF2					Q9Y2F9-2	Q9NXF8	Q9NR55	Q9NQZ2
					Q92870	P56706	Q8IUD6	P52569	Q969Y0		Q8WW18		P28562	Q14202	P07711	P30039-2						Q9P2C4	Q9Y5E9	Q9NQR1					Q9Y3B6	Q9NZJ5	Q9NRS4-2	Q9NRE2-2
					Q969F1	P57088	Q8IVH8-3	P53611	Q96BD0-3		Q8WW22		P29317	Q14554	P08173	P30281						Q9P2P1	Q9Y6U3	Q9NQR1-2					Q9Y3D0	Q9NZP8	Q9NS56-2	Q9NRR3
					Q969X5-2	P58335	Q8IVI9	P54707	Q96BY9		Q92890		P30043	Q14624-4	P08174-4	P30307						Q9UHH9	Q9Y6U3-2	Q9NRA1					Q9Y576	Q9P0P0	Q9NS84	Q9NSG2-3
					Q96BU1	P59047	Q8IWE4	P55082-2	Q96C10		Q92963-2		P30511	Q15032	P08243-2	P30613						Q9UII6		Q9NRA1-3						Q9P0S9	Q9UGM5-2	Q9NUS5
					Q96C90	P60520	Q8IY95	P55197-1	Q96CS7-5		Q969Y0		P30532	Q15102	P08697	P31153						Q9ULI4		Q9NRF9						Q9P2C4	Q9UJA2-2	Q9NWU2
					Q96FJ2	P61966	Q8IZV5	P56134-4	Q96D05		Q96BD0-3		P30622	Q15800	P09038	P33764						Q9Y2K6		Q9NSG2-3						Q9UHH9	Q9UJM3	Q9NXF8
					Q96GD3-2	P98196	Q8N139	P56377	Q96JH8		Q96BY9		P30622-2	Q15814	P09493-10	P35244						Q9Y2Z9-3		Q9NUS5						Q9UII6	Q9Y2F9-2	Q9NZJ5
					Q96IC2-2	Q01151	Q8N3X6	P56706	Q96M89-2		Q96C10		P32929	Q15818	P09493-5	P35713						Q9Y3C4-2		Q9NXF8						Q9UK55	Q9Y3B6	Q9NZP8
					Q96IX5	Q03113	Q8N5X7	P57088	Q96PY6-2		Q96CS7-5		P34931	Q16526	P09493-6	P36402						Q9Y3C7		Q9NXW9						Q9UKT7	Q9Y3D0	Q9P0P0
					Q96PM5-2	Q04756	Q8N653	P58335	Q96RQ1		Q96D05		P35367	Q16527	P09601	P36402-5						Q9Y4E5-4		Q9NZC3						Q9ULI4	Q9Y576	Q9P0S9
					Q96RQ1	Q04912	Q8N8E3	P59047	Q99551		Q96JH8		P35638	Q16611-2	P09913	P37059						Q9Y6B6		Q9P0P0						Q9Y2K6		Q9P2C4
					Q99538-3	Q06481	Q8N9I9	P60520	Q99988		Q96M89-2		P35998	Q16762	P09914	P40763								Q9P291						Q9Y3C4-2		Q9UHH9
					Q99551	Q06481-3	Q8ND82	P61966	Q9BQD3		Q96PY6-2		P38935	Q2KHR2	P0CAP2-3	P40763-2								Q9P2C4						Q9Y3C7		Q9UII6
					Q99952-2	Q08629	Q8NG08	P98196	Q9BQI3-2		Q96RQ1		P38936	Q2M1K9-2	P10124	P41212								Q9P2P1						Q9Y3D2		Q9UK55
					Q9BQD3	Q0JRZ9	Q8NHX9	Q01151	Q9BRS8		Q99551		P41223	Q2TAA2	P11047	P43354								Q9UHH9						Q9Y4E5-4		Q9UKT7
					Q9BQQ7	Q12805-2	Q8TAP6	Q03113	Q9BT67		Q99988		P41250	Q494U1-3	P11277	P46976-2								Q9UI47						Q9Y5U2-2		Q9ULI4
					Q9BRD0	Q12841	Q8TC12	Q04756	Q9BX10		Q9BQD3		P41273	Q4G148-2	P12036	P48060								Q9UII6								Q9Y2K6
					Q9BRQ0	Q13064	Q8TCA0	Q04912	Q9BYX4		Q9BQI3-2		P42680	Q53EL6-2	P13498	P48436								Q9UJA2-2								Q9Y3C4-2
					Q9BTW9	Q13137	Q8TCG2	Q06481	Q9BZM6		Q9BRS8		P43686	Q53LP3	P13726	P50453								Q9ULI4								Q9Y3C7
					Q9BU02	Q13480	Q8TE73	Q06481-3	Q9BZQ8		Q9BT67		P48741	Q5H8A4-2	P13984	P50583								Q9Y2K6								Q9Y3D2
					Q9BY41	Q13501	Q8WUB8-3	Q07820	Q9H000		Q9BX10		P49585	Q5JR59-3	P13994	P51674-3								Q9Y2Z9-3								Q9Y4E5-4
					Q9BZM6	Q13530-2	Q8WV16-4	Q08629	Q9H0R8		Q9BYX4		P49591	Q5JSL3	P14635	P51884								Q9Y3C4-2								Q9Y5U2-2
					Q9H061	Q13635	Q8WVJ2	Q0JRZ9	Q9H2G9		Q9BZM6		P49662-2	Q5JU69	P15260	P52566								Q9Y3C7								Q9Y6N9-5
					Q9H098	Q13641	Q8WVP7	Q11201	Q9H6L5		Q9BZQ8		P49703	Q5JUK3-2	P16083	P53539-10								Q9Y4E5-4
					Q9H0B3	Q13772	Q8WW01	Q12805-2	Q9H992		Q9H000		P49888	Q5T2T1	P16871	P53611								Q9Y6B6
					Q9H0R1	Q13873	Q8WW18	Q12841	Q9HCE7		Q9H0R8		P50225	Q5TEC6	P17066	P55316
					Q9H1C4	Q14106-2	Q92870	Q13064	Q9NW68		Q9H2G9		P51825	Q5VT66	P17568	P56134-4
					Q9H2K0	Q14112	Q92932	Q13137	Q9NWR8		Q9H6L5		P55268	Q68BL7	P17980	P56277
					Q9H3M7	Q14332	Q969F1	Q13480	Q9NX31		Q9H992		P57682	Q68CZ2	P18847-5	P56377
					Q9H477	Q14534	Q969X5-2	Q13491-2	Q9P0M6		Q9HCE7		P58004	Q68E01-2	P18850	P56706
					Q9H6N6	Q14596	Q96BU1	Q13501	Q9UBN6		Q9NW68		P58005	Q6AZY7	P20337	P61513
					Q9H920	Q14624-4	Q96C90	Q13530-2	Q9UF47		Q9NWR8		P60520	Q6P1X6-2	P20591	P61916
					Q9NPH2-2	Q14766	Q96E17	Q13635	Q9UHI8		Q9NX31		P61244	Q6P2D0-2	P23458	P61966
					Q9NRQ5	Q15004	Q96FJ2	Q13641	Q9UJM3		Q9P0M6		P61587	Q6PJG6	P25685	P62166
					Q9NRS4-2	Q15014	Q96GD3-2	Q13772	Q9UJX0		Q9UBN6		P61952	Q6ZRQ5	P25686	P62312
					Q9NX09	Q15038-3	Q96IC2-2	Q13873	Q9UK22		Q9UF47		P62191	Q6ZRY4	P26367	P62910
					Q9NX18	Q15043-2	Q96IX5	Q14106-2	Q9ULG6		Q9UHI8		P62328	Q709F0	P27816-3	P63279
					Q9NYZ3	Q15050	Q96PM5-2	Q14112	Q9ULJ1-6		Q9UJM3		P62979	Q7L8W6	P28562	P68431
					Q9P013	Q15413	Q96RQ1	Q14332	Q9ULP0-2		Q9UJX0		P62987	Q7LBC6	P29317	P68543
					Q9P0U4	Q15582	Q99538-3	Q14534	Q9UQC2-2		Q9UK22		P62993	Q7Z6M2	P30043	P78549-3
					Q9P2K2	Q15800	Q99551	Q14596	Q9Y244		Q9ULG6		P63092	Q86T24	P30511	P81605
					Q9UGM5-2	Q15818	Q99595	Q14624-4	Q9Y6D0		Q9ULJ1-6		P63092-2	Q86UV5-5	P30532	P81877
					Q9UIJ7	Q16678	Q99952-2	Q14766			Q9ULP0-2		P63092-3	Q86VQ0	P30622	P84243
					Q9UIL1-3	Q17RC7	Q9BQD3	Q15004			Q9UQC2-2		P78314	Q86VR8	P30622-2	P98173
					Q9ULN7	Q17RY0-2	Q9BQQ7	Q15014			Q9Y244		P78504	Q86WR7	P32189-4	Q00266
					Q9Y248	Q33E94-4	Q9BRD0	Q15038-3			Q9Y6D0		P78536	Q8IVM8	P32929	Q01151
					Q9Y450-2	Q3BBV0	Q9BRQ0	Q15043-2					P98194-9	Q8IXM2	P34931	Q01664
					Q9Y587-3	Q3T906	Q9BSJ6-2	Q15050					Q00653	Q8IXM6	P35367	Q02742
					Q9Y6U3	Q4G148-2	Q9BTW9	Q15118					Q00653-4	Q8N239	P35556	Q02880
					Q9Y6U3-2	Q5JR59-3	Q9BU02	Q15413					Q02224	Q8N2E6	P35638	Q02880-2
						Q5JU69	Q9BY41	Q15582					Q05469-2	Q8N2U0	P35998	Q04727
						Q5JUK3-2	Q9BZM6	Q15800					Q05823	Q8N3Y1	P36956	Q07864
						Q5JYT7	Q9H061	Q15818					Q06481	Q8N490	P38935	Q08117
						Q5PSV4-2	Q9H098	Q16611-2					Q06481-3	Q8N490-2	P38936	Q0JRZ9
						Q5SR56	Q9H0B3	Q16678					Q07820	Q8N568	P40189	Q11201
						Q5SYB0-3	Q9H0R1	Q17RC7					Q09019	Q8N573	P40617	Q12796
						Q5SZK8	Q9H0W9-2	Q17RY0-2					Q12772	Q8N573-2	P41220-4	Q12841
						Q5T2T1	Q9H1A3-2	Q33E94-4					Q12815	Q8N9L9	P41223	Q12882
						Q5T440	Q9H1C4	Q3BBV0					Q12929	Q8NCL4	P41250	Q12934-3
						Q5T8D3	Q9H1F0	Q3T906					Q12983	Q8NCU8	P41273	Q12999
						Q5TB80-2	Q9H2K0	Q4G148-2					Q13200	Q8TB22	P41567	Q13064
						Q5UCC4	Q9H3M7	Q5JR59-3					Q13415	Q8TB45	P41970	Q13084
						Q5VST6	Q9H477	Q5JU69					Q13470-2	Q8TD07	P42680	Q13309
						Q5VV43	Q9H6N6	Q5JUK3-2					Q13501	Q8TDP1	P43007	Q13480
						Q68BL7	Q9H819	Q5JYT7					Q13530-2	Q8TE77	P43686	Q13491-2
						Q6H3X3-2	Q9H920	Q5PSV4-2					Q13625	Q8TF76	P46527	Q14134-2
						Q6ICC9	Q9HAJ7	Q5SR56					Q13772	Q8WVD3	P48741	Q14202
						Q6IPR3	Q9NPH2-2	Q5SYB0-3					Q13829	Q8WXX0	P49585	Q14240
						Q6NSJ0	Q9NRQ5	Q5SZK8					Q14188-6	Q92530	P49589-3	Q14554
						Q6P2D0-2	Q9NRS4-2	Q5T2T1					Q14393-3	Q92570	P49591	Q14624-4
						Q6P9B9	Q9NW07	Q5T440					Q14494-2	Q92903	P49662-2	Q14766
						Q6P9F7	Q9NX09	Q5T8D3					Q14517	Q969E4	P49703	Q15032
						Q6UX65	Q9NX18	Q5TB80-2					Q14534	Q96A57	P49768-2	Q15048
						Q6YHU6	Q9NYZ3	Q5UCC4					Q14669-2	Q96AV8-3	P49888	Q15102
						Q6ZMZ0	Q9P013	Q5VST6					Q14669-3	Q96C00	P50225	Q15118
						Q709F0	Q9P0U4	Q5VUJ9-3					Q14679	Q96DP5	P51825	Q15165
						Q7L1V2	Q9P2K2	Q5VV43					Q14681	Q96DU9	P53801	Q15172
						Q7L2H7	Q9UGM5-2	Q5VWZ2					Q14940	Q96EX1	P55268	Q15582
						Q7Z6M2	Q9UHB4-4	Q68BL7					Q15011-2	Q96EX3	P57060	Q15637-6
						Q86VI4-2	Q9UIJ7	Q6H3X3-2					Q15025-7	Q96H86	P57682	Q15651
						Q86VP1	Q9UIL1-3	Q6ICC9					Q15057	Q96HQ2	P58004	Q15723-4
						Q86VP1-2	Q9ULN7	Q6IPR3					Q15493	Q96K83	P58005	Q15800
						Q86VQ6	Q9Y248	Q6NSJ0					Q15599-3	Q96LZ7	P60520	Q15814
						Q86VZ4	Q9Y450-2	Q6P2D0-2					Q15758	Q96PM9-1	P61244	Q15818
						Q8IUC8	Q9Y587-3	Q6P499-2					Q16270-2	Q96S97	P61587	Q16526
						Q8IV01	Q9Y6U3	Q6P9B9					Q16760	Q99574	P61952	Q16527
						Q8IVM8	Q9Y6U3-2	Q6P9F7					Q16822	Q99584	P62191	Q16584
						Q8IVV7		Q6UX65					Q16831	Q99674	P62195	Q16611-2
						Q8IY50-2		Q6YHU6					Q17RH7	Q99784	P62328	Q16656
						Q8IZJ3-2		Q6ZMZ0					Q17RY6	Q99807-2	P62745	Q16762
						Q8IZY2		Q6ZN66-2					Q24JP5	Q99958	P62979	Q2KHR2
						Q8N0T1		Q6ZRY4					Q2T9J0	Q9BQ48	P62987	Q2M1K9-2
						Q8N2E6		Q709F0					Q3B7T1-5	Q9BR39	P62993	Q2TAA2
						Q8N5I4		Q7L1V2					Q3BBV0	Q9BRF8	P63092	Q3B7T3-2
						Q8N8J7		Q7L2H7					Q3SXY8	Q9BUE6	P63092-2	Q3C1V9
						Q8N8Y2		Q7Z6M2					Q4G0S7	Q9BV97	P63092-3	Q3KQZ1
						Q8NA58		Q7Z7L7					Q4VC44	Q9BVJ7	P78314	Q3MIT2
						Q8NC42		Q86VI4-2					Q53G59	Q9BWT1	P78352	Q494U1-3
						Q8NCM2		Q86VP1					Q53RE8	Q9BWU1	P78504	Q4G148-2
						Q8NCU8		Q86VP1-2					Q5JRC9	Q9BWW4-2	P78536	Q53EL6-2
						Q8TB22		Q86VQ6					Q5QJE6	Q9BXR0	P78540	Q53HC0-2
						Q8TBM7-2		Q86VZ4					Q5SYB0-3	Q9BY67-5	P98172	Q53LP3
						Q8TCT0		Q86WN1					Q5T4S7	Q9BYC9	P98194-9	Q56NI9
						Q8TCU3		Q86WR7					Q5T764	Q9BYG3	Q00013-2	Q5BKX5
						Q8TD07		Q8IUC8					Q5U651	Q9C0H2-2	Q00597	Q5H8A4-2
						Q8TDP1		Q8IV01					Q5VT06	Q9H0H5	Q00653	Q5JR59-3
						Q8TF21-2		Q8IVM8					Q5VW38-2	Q9H246	Q00653-4	Q5JSL3
						Q8WUX1		Q8IVV7					Q60I27	Q9H2V7-3	Q02224	Q5JU69
						Q8WXF8		Q8IY50-2					Q68CR1-2	Q9H329	Q05469-2	Q5JUK3-2
						Q8WYA0		Q8IZJ3-2					Q68DA7-3	Q9H334	Q05823	Q5K4L6
						Q8WZ19		Q8IZY2					Q6FIF0	Q9H553	Q06481	Q5SNT2
						Q92503		Q8N0T1					Q6GMR7	Q9H6I2	Q06481-3	Q5SZK8
						Q92536		Q8N2E6					Q6GMV3	Q9H6R0	Q07820	Q5T2T1
						Q92564		Q8N5I4					Q6NUT3-2	Q9H9H4	Q09019	Q5T601
						Q92570		Q8N8J7					Q6P2H3-2	Q9HCM7	Q12772	Q5T8I3
						Q92585		Q8N8Y2					Q6P4R8-3	Q9NP74	Q12815	Q5TCX8
						Q92903		Q8NA58					Q6P9F0	Q9NP84	Q12929	Q5TEC6
						Q93075		Q8NC42					Q6PD74	Q9NPL8	Q12968	Q5TF39
						Q93096		Q8NCM2					Q6PID8	Q9NQT4	Q12983	Q5VT66
						Q969P5-2		Q8NCU8					Q6QNY1	Q9NS84	Q13200	Q5VUA4
						Q969S6		Q8TB22					Q6S9Z5	Q9NSY0	Q13216	Q63HM9
						Q96B67		Q8TBM7-2					Q6UWJ1-3	Q9NUU6	Q13277-2	Q68BL7
						Q96BP2		Q8TCT0					Q6ZMB5	Q9NVE5	Q13415	Q68CZ1
						Q96DU9		Q8TCU3					Q6ZMZ0	Q9NWF9	Q13470-2	Q68CZ2
						Q96EG3		Q8TD07					Q6ZRV2	Q9NYZ3	Q13501	Q68E01-2
						Q96FF7		Q8TDP1					Q6ZT12	Q9NZP8	Q13530-2	Q69YU5
						Q96G04-2		Q8TF21-2					Q6ZT98	Q9P0S9	Q13572	Q6AI08
						Q96G75		Q8WUX1					Q6ZWE6-2	Q9P2K6	Q13625	Q6AZY7
						Q96H86		Q8WV19					Q70EL1	Q9P2P1	Q13635	Q6IPR3
						Q96K49		Q8WXF8					Q70Z35	Q9UBX5	Q13772	Q6NXG1
						Q96MC6		Q8WYA0					Q71RC2	Q9UHC1	Q13829	Q6NXT2
						Q96NB1		Q8WZ19					Q75T13-3	Q9UHK6	Q14114	Q6P1X6-2
						Q96NT0		Q92503					Q76N89	Q9UI47	Q14188-6	Q6P2D0-2
						Q96PC3-4		Q92536					Q7L273	Q9UIF7-6	Q14393-3	Q6P9B9
						Q96QD8		Q92564					Q7Z2Y8	Q9UII6	Q14494-2	Q6PII5-2
						Q96S97		Q92570					Q7Z3T8	Q9UKR5	Q14517	Q6PJG6
						Q96SL1		Q92585					Q7Z419	Q9UNH6	Q14534	Q6RI45
						Q99075		Q92903					Q7Z4F1	Q9Y221	Q14669-2	Q6UWZ7
						Q99500		Q93075					Q7Z7A1	Q9Y2K6	Q14669-3	Q6YP21
						Q99650		Q93096					Q86U44	Q9Y2T5	Q14679	Q6ZRQ5
						Q99732		Q969P5-2					Q86VI4-2	Q9Y2Y0-2	Q14681	Q6ZRY4
						Q9BQ48		Q969S6					Q86VP1	Q9Y3D2	Q14940	Q709F0
						Q9BQB6		Q96B67					Q86VP1-2	Q9Y3E1	Q15011-2	Q71DI3
						Q9BRN9		Q96BP2					Q86VW1-2	Q9Y3Z3	Q15025-7	Q75N03
						Q9BST9		Q96DU9					Q86XS8-2	Q9Y4K3	Q15057	Q7L8W6
						Q9BUE6		Q96EG3					Q86XZ4	Q9Y546	Q15493	Q7LBC6
						Q9BV97		Q96EL2					Q86YV0	Q9Y664	Q15599-3	Q7Z6M2
						Q9BVJ7		Q96FF7					Q8IUI8	Q9Y6A9	Q15646	Q7Z7M0-2
						Q9BWT1		Q96G04-2					Q8IV38	Q9Y6I8	Q15758	Q86T24
						Q9BXR0		Q96G75					Q8IVB4		Q15797	Q86UQ4
						Q9BXS0-3		Q96H86					Q8IVG5		Q16186	Q86UU0-4
						Q9BYG3		Q96HR8					Q8IVH8-3		Q16270-2	Q86UV5-5
						Q9BYN0		Q96K49					Q8IVL1		Q16610	Q86VQ0
						Q9BZL1		Q96MC6					Q8IW41		Q16760	Q86VR8
						Q9C037		Q96NB1					Q8IW50		Q16822	Q86WR7
						Q9C0B9		Q96NE9-2					Q8IW50-3		Q16831	Q8IV01
						Q9GZP1		Q96NT0					Q8IWE4		Q17RH7	Q8IV35
						Q9GZQ8		Q96PC3-4					Q8IWV8-4		Q17RS7	Q8IV63-3
						Q9H0H5		Q96QD8					Q8IXJ6-2		Q17RY6	Q8IVB5
						Q9H1J7		Q96S97					Q8IY50-2		Q24JP5	Q8IVM8
						Q9H305-3		Q96SL1					Q8N1W1		Q2T9J0	Q8IVV7
						Q9H3F6		Q99075					Q8N2G8		Q3B7T1-5	Q8IXM2
						Q9H446		Q99500					Q8N414		Q3BBV0	Q8IXM6
						Q9H553		Q99650					Q8N511		Q3SXY8	Q8IZJ3-2
						Q9H6L5		Q99732					Q8N5I9		Q4G0I0	Q8IZY2
						Q9H6R0		Q9BQ48					Q8N653		Q4G0S7	Q8N1P7
						Q9H6Y7		Q9BQB6					Q8N9I9		Q4LDG9	Q8N239
						Q9H7F4		Q9BRN9					Q8NA72-3		Q4VC44	Q8N2E6
						Q9HAB3		Q9BRY0					Q8NC42		Q4VC44-2	Q8N2U0
						Q9HCE7		Q9BST9					Q8NCS4		Q53EZ4	Q8N3X6
						Q9NP84		Q9BUE6					Q8NCX0		Q53G59	Q8N3Y1
						Q9NPA8-2		Q9BV97					Q8NE28-3		Q53H80	Q8N490
						Q9NPF2		Q9BVJ7					Q8NG08		Q53RE8	Q8N490-2
						Q9NQR1		Q9BWT1					Q8TAA5		Q5JRC9	Q8N531
						Q9NQR1-2		Q9BXR0					Q8TB40		Q5QJE6	Q8N568
						Q9NQX7		Q9BXS0-3					Q8TBA6		Q5SYB0-3	Q8N573
						Q9NR12-6		Q9BYC9					Q8TC12		Q5T0W9	Q8N573-2
						Q9NRA1		Q9BYG3					Q8TCB0		Q5T4S7	Q8N5I4
						Q9NRA1-3		Q9BYN0					Q8TCD1		Q5T764	Q8N9L9
						Q9NRA2		Q9BZL1					Q8TD31		Q5U651	Q8NA58
						Q9NRF9		Q9C037					Q8TDB8-4		Q5VT06	Q8NB15
						Q9NRX5		Q9C0B9					Q8TDM0-2		Q5VW38-2	Q8NBR6
						Q9NS68-2		Q9GZP1					Q8TE04		Q60I27	Q8NCC3
						Q9NS84		Q9GZQ8					Q8TE58		Q68CR1-2	Q8NCL4
						Q9NU19		Q9H0H5					Q8TEH3-2		Q68DA7-3	Q8NCU4
						Q9NU53		Q9H1J7					Q8TEQ0		Q6FIF0	Q8NCU8
						Q9NV92		Q9H2D1					Q8TEY7-2		Q6GMR7	Q8NDC0
						Q9NVX0		Q9H2V7-3					Q8WU10		Q6GMV3	Q8NE86-3
						Q9NWD8		Q9H305-3					Q8WU67		Q6MZP7	Q8TB22
						Q9NYR9-3		Q9H3F6					Q8WUM9		Q6NTF9	Q8TB45
						Q9NYV6		Q9H3L0					Q8WV48-5		Q6NUT3-2	Q8TCN5
						Q9NZP8		Q9H446					Q8WW22		Q6P1N9	Q8TD07
						Q9P0P0		Q9H553					Q8WXF7		Q6P2H3-2	Q8TDN2
						Q9P0R6		Q9H6L5					Q8WZ19		Q6P4R8-3	Q8TDP1
						Q9P0S9		Q9H6R0					Q8WZ73		Q6P9F0	Q8TE77
						Q9P1Z2-2		Q9H6Y7					Q92598		Q6PD74	Q8TEA8
						Q9UBV8		Q9H7F4					Q92890		Q6PID8	Q8TF76
						Q9UBX5		Q9HAB3					Q92896-2		Q6QNY1	Q8WVD3
						Q9UGU5		Q9HCE7					Q92963-2		Q6S9Z5	Q8WXX0
						Q9UHH9		Q9NP84					Q92966		Q6UWJ1-3	Q8WYA0
						Q9UHR5-2		Q9NPA8-2					Q92997		Q6V9R5-2	Q92530
						Q9UI47		Q9NPF2					Q969K3		Q6ZMB5	Q92564
						Q9UIF7-6		Q9NQR1					Q969L4		Q6ZMW3	Q92570
						Q9UII6		Q9NQR1-2					Q969Y0		Q6ZMZ0	Q92585
						Q9UJX0		Q9NQX7					Q96A54		Q6ZNA4-2	Q92903
						Q9ULG6		Q9NR12-6					Q96BD0-3		Q6ZRV2	Q969E4
						Q9ULG6-3		Q9NRA1					Q96BY9		Q6ZT12	Q969J3
						Q9UP38		Q9NRA1-3					Q96BZ8		Q6ZT98	Q96A57
						Q9UPQ4		Q9NRA2					Q96C03		Q6ZWE6-2	Q96AV8-3
						Q9Y221		Q9NRF9					Q96C10		Q6ZWT7	Q96BP2
						Q9Y287		Q9NRX5					Q96C34-2		Q70EL1	Q96C00
						Q9Y3C4-2		Q9NS68-2					Q96CF2		Q70Z35	Q96C12
						Q9Y3C7		Q9NS84					Q96CS7-5		Q71RC2	Q96C92-2
						Q9Y5Z0-5		Q9NSG2-3					Q96D05		Q71RG4-2	Q96CD0
						Q9Y664		Q9NU19					Q96DR4		Q75T13-3	Q96DP5
						Q9Y6B6		Q9NU53					Q96DU7		Q76N89	Q96DU9
						Q9Y6I8		Q9NUU6					Q96EN9-3		Q7L273	Q96EX1
						Q9Y6V7		Q9NV92					Q96GY3		Q7L311	Q96EX3
						Q9Y6X6-4		Q9NVX0					Q96HY6		Q7Z2Y8	Q96G23
						Q9Y6Y0		Q9NWD8					Q96JH8		Q7Z3E2	Q96GD4
								Q9NY47					Q96KC8		Q7Z3T8	Q96GN5
								Q9NYA1-2					Q96LT7		Q7Z419	Q96GR4
								Q9NYR9-3					Q96M89-2		Q7Z4F1	Q96GX9
								Q9NYV6					Q96PM5-2		Q7Z5L2-2	Q96H86
								Q9NZP8					Q96PY6-2		Q7Z5Y7	Q96HQ2
								Q9P0P0					Q96Q42		Q7Z699	Q96JM7
								Q9P0R6					Q96Q83		Q7Z7A1	Q96JP2
								Q9P0S9					Q96RQ1		Q86SQ4-2	Q96K49
								Q9P1Z2-2					Q96SN8		Q86TM6-2	Q96K83
								Q9P2M7					Q96ST8		Q86U44	Q96LZ7
								Q9UBV8					Q99551		Q86VI4-2	Q96MN5
								Q9UBX5					Q99614		Q86VP1	Q96MX3
								Q9UGU5					Q99615		Q86VP1-2	Q96NT0
								Q9UHC1					Q99653		Q86VW1-2	Q96NU7
								Q9UHH9					Q99988		Q86WA9	Q96P53
								Q9UHR5-2					Q99996		Q86XS8-2	Q96PC3-4
								Q9UI47					Q99996-3		Q86XZ4	Q96PM9-1
								Q9UIF7-6					Q9BQD3		Q86Y91-6	Q96PP8
								Q9UII6					Q9BQE4		Q86YQ8	Q96QD9
								Q9UJP4					Q9BQE5		Q86YV0	Q96S55-2
								Q9UJX0					Q9BQI3-2		Q8IUC6	Q96S97
								Q9ULG6					Q9BRS8		Q8IUI8	Q96SL1
								Q9ULG6-3					Q9BRV8		Q8IV38	Q99574
								Q9ULZ3					Q9BRX2		Q8IVB4	Q99583
								Q9UM00-1					Q9BSJ5		Q8IVG5	Q99584
								Q9UP38					Q9BT67		Q8IVH8-3	Q99674
								Q9UPQ4					Q9BTU6		Q8IVL0	Q99766
								Q9Y221					Q9BWG6		Q8IVL1	Q99784
								Q9Y287					Q9BX10		Q8IW41	Q99807-2
								Q9Y3C4-2					Q9BX69		Q8IW50	Q99958
								Q9Y3C7					Q9BYX4		Q8IW50-3	Q99967-2
								Q9Y5Q5-2					Q9BZM6		Q8IWE4	Q99973-2
								Q9Y5Z0-5					Q9BZQ8		Q8IWU2	Q9BQ48
								Q9Y664					Q9C0D2		Q8IWV8-4	Q9BR39
								Q9Y6B6					Q9H000		Q8IXJ6-2	Q9BR76
								Q9Y6I8					Q9H015		Q8IXJ9	Q9BRF8
								Q9Y6V7					Q9H0R8		Q8IXW5-2	Q9BRR6-5
								Q9Y6X6-4					Q9H1U9		Q8IY50-2	Q9BS16
								Q9Y6Y0					Q9H1Z9		Q8IYB8	Q9BUE6
													Q9H2G9		Q8IYL2	Q9BV97
													Q9H3C7		Q8IYR2	Q9BVJ7
													Q9H477		Q8IZV5	Q9BWD1
													Q9H4H8		Q8N128	Q9BWT1
													Q9H5V7		Q8N1W1	Q9BWU1
													Q9H6L5		Q8N2G8	Q9BWW4-2
													Q9H6S1		Q8N2K1	Q9BX63
													Q9H813		Q8N2Y8	Q9BXJ1
													Q9H8M5		Q8N357	Q9BXR0
													Q9H920		Q8N414	Q9BY67-5
													Q9H992		Q8N4S0	Q9BYC9
													Q9HB09-3		Q8N511	Q9BYG3
													Q9HBL6		Q8N5H3	Q9C0H2-2
													Q9HCE7		Q8N5I9	Q9GZT4
													Q9NQX7		Q8N5X7	Q9H0H5
													Q9NQZ5		Q8N653	Q9H246
													Q9NRC1		Q8N7W2-2	Q9H2V7-3
													Q9NSV4		Q8N9I9	Q9H329
													Q9NUQ8		Q8NA72-3	Q9H334
													Q9NV58-3		Q8NC42	Q9H4B0
													Q9NVV0		Q8NC54	Q9H553
													Q9NW68		Q8NCS4	Q9H6I2
													Q9NWD8		Q8NCX0	Q9H6R0
													Q9NWR8		Q8NE28-3	Q9H857-2
													Q9NWT6		Q8NFW8	Q9H8M1-2
													Q9NX01		Q8NG08	Q9H9H4
													Q9NX31		Q8NGI9	Q9HC10
													Q9NX45		Q8NHQ8	Q9HCM7
													Q9NXV2		Q8TAA5	Q9NNW7
													Q9NY93		Q8TB40	Q9NP74
													Q9NYG5		Q8TBA6	Q9NP84
													Q9NZZ3		Q8TC12	Q9NPH0
													Q9P021		Q8TCB0	Q9NPL8
													Q9P0M6		Q8TCD1	Q9NQL9
													Q9UBN6		Q8TD31	Q9NQT4
													Q9UDT6-2		Q8TD55	Q9NR12-6
													Q9UDY2		Q8TDB8-4	Q9NR19
													Q9UDY4		Q8TDM0-2	Q9NRA1
													Q9UF47		Q8TE04	Q9NRA1-3
													Q9UGM5-2		Q8TE58	Q9NRF9
													Q9UHD1		Q8TEH3-2	Q9NRL2
													Q9UHI8		Q8TEQ0	Q9NRP4
													Q9UII4		Q8TEY7-2	Q9NS84
													Q9UJ83-2		Q8WU10	Q9NSB4
													Q9UJM3		Q8WU67	Q9NSY0
													Q9UJP4		Q8WUM9	Q9NTN3
													Q9UJX0		Q8WV16-4	Q9NU19
													Q9UJY1		Q8WV48-5	Q9NUJ3
													Q9UK22		Q8WVP7	Q9NUU6
													Q9UKA4		Q8WW18	Q9NV79
													Q9UKK3		Q8WW22	Q9NVE5
													Q9UKN7		Q8WXF7	Q9NVP2
													Q9UKZ9		Q8WZ19	Q9NVX0
													Q9ULG6		Q8WZ73	Q9NW07
													Q9ULJ1-6		Q92598	Q9NWF9
													Q9ULP0-2		Q92845	Q9NX08
													Q9UM11-3		Q92890	Q9NXF8
													Q9UNZ2		Q92896-2	Q9NXR5
													Q9UPN3		Q92959	Q9NYZ3
													Q9UPN3-2		Q92963-2	Q9NZP8
													Q9UPN3-3		Q92966	Q9P0R6
													Q9UPY5		Q92997	Q9P0S9
													Q9UQC2-2		Q969K3	Q9P2C4
													Q9Y244		Q969L4	Q9P2H0
													Q9Y297		Q969Y0	Q9P2K6
													Q9Y2H0		Q96A54	Q9P2P1
													Q9Y2H0-3		Q96BD0-3	Q9P2X3
													Q9Y2H5		Q96BY9	Q9UBV8
													Q9Y2M5		Q96BZ8	Q9UBX5
													Q9Y421		Q96C03	Q9UF56
													Q9Y4H2		Q96C10	Q9UFW8
													Q9Y4K1-1		Q96C34-2	Q9UGU5
													Q9Y4K4		Q96CF2	Q9UH17
													Q9Y561-2		Q96CS7-5	Q9UH62
													Q9Y5E9		Q96D05	Q9UHA2
													Q9Y5F8-2		Q96DD7	Q9UHC1
													Q9Y5J5		Q96DR4	Q9UHH9
													Q9Y5Q0		Q96DU7	Q9UHK6
													Q9Y5U4		Q96E22	Q9UHX3
													Q9Y617		Q96EG3	Q9UHY7
													Q9Y6D0		Q96EN9-3	Q9UI47
													Q9Y6N5		Q96FX2	Q9UIF7-6
															Q96FX8	Q9UII6
															Q96G97-3	Q9UJX5
															Q96G97-4	Q9UKR5
															Q96GJ1-3	Q9UKT5-2
															Q96GY3	Q9UNH6
															Q96HY6	Q9Y221
															Q96IK1	Q9Y2K6
															Q96JH8	Q9Y2T5
															Q96KC8	Q9Y2Y0-2
															Q96LT4-2	Q9Y2Y9
															Q96LT7	Q9Y3D2
															Q96M89-2	Q9Y3E1
															Q96PM5-2	Q9Y3Z3
															Q96PY6-2	Q9Y4K3
															Q96Q42	Q9Y4P1-6
															Q96Q83	Q9Y546
															Q96Q89	Q9Y664
															Q96RQ1	Q9Y6A9
															Q96S94	Q9Y6E2
															Q96SI1	Q9Y6I8
															Q96SN8	Q9Y6Y0
															Q96ST8
															Q99075
															Q99551
															Q99614
															Q99615
															Q99653
															Q99717
															Q99988
															Q99996
															Q99996-3
															Q9BQD3
															Q9BQE4
															Q9BQE5
															Q9BQI3-2
															Q9BRS8
															Q9BRV8
															Q9BRX2
															Q9BSJ5
															Q9BT67
															Q9BTU6
															Q9BU19-2
															Q9BUB5-2
															Q9BV38
															Q9BWG6
															Q9BX10
															Q9BX69
															Q9BYC8
															Q9BYX4
															Q9BZI7-2
															Q9BZM6
															Q9BZQ8
															Q9C0D2
															Q9GZN8
															Q9GZZ1
															Q9H000
															Q9H015
															Q9H061
															Q9H0R8
															Q9H1U9
															Q9H1Z9
															Q9H2G9
															Q9H2K0
															Q9H3C7
															Q9H477
															Q9H4H8
															Q9H5V7
															Q9H6L5
															Q9H6R7
															Q9H6S1
															Q9H799-5
															Q9H813
															Q9H892
															Q9H8M5
															Q9H8W3
															Q9H903
															Q9H920
															Q9H992
															Q9HB09-3
															Q9HBG4
															Q9HBL6
															Q9HC77
															Q9HCE7
															Q9HD34
															Q9NP78
															Q9NP80
															Q9NQG7-3
															Q9NQX7
															Q9NQZ5
															Q9NRC1
															Q9NRH1
															Q9NRH2
															Q9NRX5
															Q9NSV4
															Q9NUQ8
															Q9NV58-3
															Q9NVF7
															Q9NVV0
															Q9NVW2
															Q9NW68
															Q9NWD8
															Q9NWR8
															Q9NWT6
															Q9NX01
															Q9NX18
															Q9NX31
															Q9NX45
															Q9NXV2
															Q9NY93
															Q9NYG5
															Q9NZZ3
															Q9P021
															Q9P0L2
															Q9P0M6
															Q9P0N9
															Q9P2K1
															Q9P2W9
															Q9UBB4
															Q9UBN6
															Q9UDT6-2
															Q9UDY2
															Q9UDY4
															Q9UF47
															Q9UGM5-2
															Q9UHD1
															Q9UHI8
															Q9UHW5
															Q9UI43
															Q9UII4
															Q9UJ83-2
															Q9UJM3
															Q9UJP4
															Q9UJX0
															Q9UJY1
															Q9UK22
															Q9UKA4
															Q9UKB1-2
															Q9UKK3
															Q9UKN7
															Q9UKZ9
															Q9ULG6
															Q9ULI4
															Q9ULJ1-6
															Q9ULP0-2
															Q9UM11-3
															Q9UNZ2
															Q9UPN3
															Q9UPN3-2
															Q9UPN3-3
															Q9UPV9-3
															Q9UPW5-3
															Q9UPY5
															Q9UPY8
															Q9UQC2-2
															Q9UQN3
															Q9Y244
															Q9Y297
															Q9Y2H0
															Q9Y2H0-3
															Q9Y2H5
															Q9Y2J4
															Q9Y2M5
															Q9Y314
															Q9Y320
															Q9Y421
															Q9Y4H2
															Q9Y4K1-1
															Q9Y4K4
															Q9Y4L5
															Q9Y561-2
															Q9Y5E9
															Q9Y5F0
															Q9Y5F8-2
															Q9Y5I4
															Q9Y5J5
															Q9Y5Q0
															Q9Y5U4
															Q9Y617
															Q9Y6D0
															Q9Y6N5
